# Supplementary material for: Lesion-Related Delusional Misidentification Syndromes: A Comprehensive Review of Reported Cases
Source: Atypon-hosted journal article supplement (doi:10.1176/appi.neuropsych.15100376), 2016-02-22
Supplement: appi.neuropsych.15100376.ds001.pdf [file appi.neuropsych.15100376.ds001.pdf]

## Supplementary Data

Supplementary Table 1: Individual DMS Cases

| Patient | Delusion(s)                                                 | Reference                                                                                         |
|---------|-------------------------------------------------------------|---------------------------------------------------------------------------------------------------|
| 1       | Mother and friend as imposters, hospital as replica         | Br J Psychiatry. 1990 Oct;157:608-10.                                                             |
| 2       | Cotard Delusion                                             | J Neuropsychiatry Clin Neurosci. 2014 Winter;26(1):E29-30. doi: 10.1176/appi.neuropsych.13020021. |
| 3       | Room as replica                                             | J Neuropsychiatry Clin Neurosci. 2013 Summer;25(3):E16-8. doi: 10.1176/appi.neuropsych.12030072.  |
| 4       | Wife as imposter                                            | Psychiatry Clin Neurosci. 1999 Aug;53(4):455-9.                                                   |
| 5       | Son as imposter                                             | Psychiatry Clin Neurosci. 1999 Aug;53(4):455-9.                                                   |
| 6       | Hospital as replica                                         | Neuropsychiatry Neuropsychol Behav Neurol. 1997 Jul;10(3):190-6.                                  |
| 7       | Daughter as imposter                                        | Neuropsychiatry Neuropsychol Behav Neurol. 1997 Jul;10(3):190-6.                                  |
| 8       | Family members as imposters                                 | Br J Psychiatry. 1971 Jul;119(548):25-31.                                                         |
| 9       | Sister and neighbors as imposters                           | Postgrad Med J. 1990 Dec;66(782):1064-7.                                                          |
| 10      | Rooms as replicas                                           | Brain 67:331-358, 1944                                                                            |
| 11      | Father as imposter, self as a double, countries as replicas | Proc Biol Sci. 1997 Mar 22;264(1380):437-44.                                                      |
| 12      | Parents as imposters                                        | Br J Psychiatry. 1977 Jan;130:68-71.                                                              |
| 13      | Home and car as replica                                     | J Med Assoc Thai. 2004 Dec;87(12):1526-9.                                                         |
| 14      | Husband as imposter, home as replica                        | Cortex. 2014 Mar;52:75-85. doi: 10.1016/j.cortex.2013.11.011. Epub 2013 Dec 12.                   |
| 15      | Cotard Delusion                                             | Eur J Neurol. 2013 Jul;20(7):e98-9. doi: 10.1111/ene.12171.                                       |
| 16      | Home as replica, husband as imposter                        | J Neurol Neurosurg Psychiatry. 2010 Jan;81(1):52-3. doi: 10.1136/jnnp.2009.178137.                |
| 17      | Wife as imposter                                            | Psychopathology. 2001 Nov-Dec;34(6):299-304.                                                      |
| 18      | Physicians as imposters                                     | Crit Care. 2001 Aug;5(4):232-5. Epub 2001 Jul 13.                                                 |
| 19      | Wife and children as imposters, house as replica            | Cortex. 1999 Jun;35(3):413-22.                                                                    |

|    |                                                                                                            |                                                                                                  |
|----|------------------------------------------------------------------------------------------------------------|--------------------------------------------------------------------------------------------------|
| 20 | Home as replica                                                                                            | J Geriatr Psychiatry Neurol. 1998 Winter;11(4):174-80.                                           |
| 21 | Hospital as replica                                                                                        | Neuropsychiatry Neuropsychol Behav Neurol. 1997 Jul;10(3):190-6.                                 |
| 22 | Hospital as replica                                                                                        | Neuropsychiatry Neuropsychol Behav Neurol. 1997 Jul;10(3):190-6.                                 |
| 23 | House and hospital as replicas                                                                             | J Neurol Neurosurg Psychiatry. 1988 Apr;51(4):579-81.                                            |
| 24 | Parents as imposters                                                                                       | Br J Psychiatry. 1987 Jan;150:117-21.                                                            |
| 25 | Wife and children as imposters                                                                             | Neurology. 1979 Mar;29(3):334-9.                                                                 |
| 26 | Hospital and house as replicas                                                                             | J Neurol Neurosurg Psychiatry. 1983 Dec;46(12):1154.                                             |
| 27 | Family as imposters                                                                                        | Epilepsy Behav. 2006 Aug;9(1):189-92.                                                            |
| 28 | Mother as imposter, self as not real self                                                                  | Neurocse (2000) Vol. 6, pp. 57-63                                                                |
| 29 | Husband as sister, additional house, phantom boarders                                                      | J Neurol Neurosurg Psychiatry. 2000 Nov;69(5):645-8.                                             |
| 30 | Cotard Delusion, house as replica, other patient as familiar                                               | Cogn Behav Neurol. 2012 Dec;25(4):216-23. doi: 10.1097/WNN.0b013e31827504c7.                     |
| 31 | Parents as imposters, stranger as friend, doctor as friend's mother,                                       | Psychopathology. 1994;27(3-5):200-10.                                                            |
| 32 | Hospital within home, multiple replica hospitals                                                           | Neuropsychiatry Neuropsychol Behav Neurol. 1997 Jul;10(3):190-6.                                 |
| 33 | Other patient as familiar, nurses as duplicate                                                             | Int J Neurosci. 1988 Dec;43(3-4):219-24.                                                         |
| 34 | Parents as imposters, self as imposter double, house as replica, events- as familiar and already occurring | Cortex. 1982 Apr;18(1):23-35.                                                                    |
| 35 | Hospital in home                                                                                           | J Neuropsychiatry Clin Neurosci. 2014 Winter;26(1):E11. doi: 10.1176/appi.neuropsych.12120391.   |
| 36 | House as familiar                                                                                          | J Neuropsychiatry Clin Neurosci. 2013 Summer;25(3):E16-8. doi: 10.1176/appi.neuropsych.12030072. |
| 37 | Park near hospital as familiar                                                                             | Neuropsychiatry Neuropsychol Behav Neurol. 1997 Jul;10(3):190-6.                                 |
| 38 | Hospital in house                                                                                          | Neurology. 1976 Feb;26(2):147-51.                                                                |
| 39 | Hospital in home state                                                                                     | Neurology. 1976 Feb;26(2):147-51.                                                                |
| 40 | Hospital in home                                                                                           | Behav Neurol. 2008;20(3):83-9.                                                                   |
| 41 | Hospital in home                                                                                           | J Neurol Neurosurg Psychiatry. 1981 May;44(5):382-6.                                             |
| 42 | Hospital in house                                                                                          | J Neurol Neurosurg Psychiatry. 1981 May;44(5):382-6.                                             |

|    |                                                                                                                                           |                                                                                                                               |
|----|-------------------------------------------------------------------------------------------------------------------------------------------|-------------------------------------------------------------------------------------------------------------------------------|
| 43 | Hospital in house                                                                                                                         | J Neurol Neurosurg Psychiatry. 1981 May;44(5):382-6.                                                                          |
| 44 | Hospital in house, patient as her husband                                                                                                 | J Neurol Neurosurg Psychiatry. 1981 May;44(5):382-6.                                                                          |
| 45 | Hospital in workplace, patients as coworkers                                                                                              | In: TE Feinberg and JP Keenan. The Lost Self: Pathologies of the Brain and Identity. Oxford University Press, New York, 2005. |
| 46 | Stranger as daughter                                                                                                                      | Behav Neurol. 1991;4(2):81-7. doi: 10.3233/BEN-1991-4204.                                                                     |
| 47 | Hospital in home                                                                                                                          | Neurology. 1987 Apr;37(4):701-3.                                                                                              |
| 48 | Landmarks as familiar                                                                                                                     | Neurocase. 2013;19(5):445-50. doi: 10.1080/13554794.2012.690428. Epub 2012 Aug 9.                                             |
| 49 | Other patient as her husband                                                                                                              | Keio J Med. 2007 Dec;56(4):130-4.                                                                                             |
| 50 | Hospital as familiar                                                                                                                      | Cogn Behav Neurol. 2011 Mar;24(1):35-9. doi: 10.1097/WNN.0b013e31821129b7.                                                    |
| 51 | Events as familiar                                                                                                                        | Can J Neurol Sci. 2010 Jul;37(4):468-72.                                                                                      |
| 52 | Stranger as nephew, event as familiar                                                                                                     | Neurol Sci. 2000 Oct;21(5):324-8.                                                                                             |
| 53 | Room as familiar                                                                                                                          | Ann N Y Acad Sci. 2000 Jun;911:447-52.                                                                                        |
| 54 | Event (accident) as continuing                                                                                                            | Cortex. 1995 Mar;31(1):183-90.                                                                                                |
| 55 | Stranger as cousin, stranger as friend                                                                                                    | J Nerv Ment Dis. 1987 Jul;175(7):433-8.                                                                                       |
| 56 | Nurses as family, hospital as office                                                                                                      | Behav Neurol. 2008;20(3):83-9.                                                                                                |
| 57 | Hospital in familiar country                                                                                                              | Arch Neurol. 1982 Jan;39(1):33-6.                                                                                             |
| 58 | Wife as dead mother, nurse as granddaughter, hospital as home, hospital as lakehouse                                                      | Brain Cogn. 1993 Nov;23(2):222-30.                                                                                            |
| 59 | Patient as son, patient as daughter-in-law, patient as coworker, self as famous figure skater; hospital as same hospital right next to it | Cortex. 1999 Jun;35(3):373-87.                                                                                                |
| 60 | Hospital as inside home, doctor as relative                                                                                               | Brain & NeuroRehabilitation Vol. 6, No. 1, March, 2013                                                                        |
| 61 | Patient as mother, fictitious baby in hospital                                                                                            | Neurocise (1999) Vol. 5. pp. 251-262                                                                                          |
